# Supplementary material
Source: Springer Nature journal article supplement (https://www.springermedizin.de/resource/supplementary/12889_2013_6260_MOESM3_ESM.pdf/9498816)
Supplement: MOESM3 [file 9498816]

Box 3: Characteristics of patients presenting with ARI consulting a GROG practitioner but NOT included in the study (259) in comparison with patients included in the study (201)

|                                             | <i>Younger children</i> |                 |          | <i>Older children</i> |                 |          | <i>Adults</i>       |                 |          | <i>Elderly</i>      |                 |          | <i>All ages</i>     |                 |          |
|---------------------------------------------|-------------------------|-----------------|----------|-----------------------|-----------------|----------|---------------------|-----------------|----------|---------------------|-----------------|----------|---------------------|-----------------|----------|
|                                             | <i>0-4 yo</i>           |                 |          | <i>5-14 yo</i>        |                 |          | <i>15-64 yo</i>     |                 |          | <i>≥65 yo</i>       |                 |          |                     |                 |          |
|                                             | <i>NOT included</i>     | <i>included</i> | <i>p</i> | <i>NOT included</i>   | <i>included</i> | <i>p</i> | <i>NOT included</i> | <i>included</i> | <i>p</i> | <i>NOT included</i> | <i>included</i> | <i>p</i> | <i>NOT included</i> | <i>included</i> | <i>p</i> |
| <b>Nb of patients</b>                       | 67                      | 50              | -        | 112                   | 91              | -        | 67                  | 46              | -        | 10                  | 14              | -        | 256*                | 201             | -        |
| (% per age group)                           | (26%)                   | (25%)           |          | (44%)                 | (45%)           |          | (26%)               | (23%)           |          | (4%)                | (7%)            |          | (100%)              | (100%)          |          |
| <b>Age (yo) mean±SD</b>                     | 2.6±1.3                 | 2.6±1.3         | 0.95     | 7.9±2.7               | 9.3±2.8         | <0.001   | 33.6±14.8           | 31.5±13.7       | 0.40     | 68.4±3.8            | 72.1±5.7        | <0.1     | 15.6±18.0           | 17.1±19.7       | 0.37     |
| <b>Vaccine**</b><br>(number vaccinated)     | 3                       | 2               | -        | 4                     | 3               | -        | 4                   | 2               | -        | 2                   | 8               | -        | 13                  | 15              | 0.15     |
| <b>Risk Factors**</b><br>(number with risk) | 1                       | 2               | -        | 5                     | 5               | -        | 7                   | 5               | -        | 1                   | 5               | -        | 14                  | 17              | <0.1     |
| <i>pregnancy</i>                            | NA                      | NA              | -        | NA                    | NA              | -        | 2                   | 3               | -        | NA                  | NA              | -        | 2                   | 3               | -        |
| <i>BMI&gt;30</i>                            | 0                       | 0               | -        | 0                     | 1               | -        | 2                   | 0               | -        | 1                   | 0               | -        | 3                   | 1               | -        |
| <i>chronic disease</i>                      | 1                       | 2               | -        | 5                     | 4               | -        | 3                   | 2               | -        | 0                   | 5               | -        | 9                   | 13              | -        |

\* Description is based on 256 patients (from 259 patients not included, 3 did not report date of birth)

\*\*p value not calculated due to small sample size (<10)

yo: years old
